# Supplementary material for: A step towards the processability of insoluble or partially soluble functional and structural variants of polymers based on 3,4-alkylenedioxythiophene
Source: Royal Society of Chemistry journal article supplement (doi:10.1039/c6ra20592e), 2016-01-01
Supplement: c6ra20592e1.pdf [file c6ra20592e1.pdf]

## A Step Towards the Processability of Insoluble or Partially soluble – Functional and Structural Variants of Polymers Based on 3,4-Alkylenedioxythiophene”

**Bikash Kumar Sikder<sup>a,b</sup>**

<sup>a</sup>Department of Chemistry, Indian Institute of Technology Bombay, Powai, Mumbai 400076, India.

bksikder@chem.iitb.ac.in, bksikder@uohyd.ac.in

### Table of Contents

|                 |                                                     |
|-----------------|-----------------------------------------------------|
| <b>Fig. S1</b>  | <sup>1</sup> H NMR spectra of <b>P1d</b>            |
| <b>Fig. S2</b>  | <sup>1</sup> H NMR spectra of <b>P1e</b>            |
| <b>Fig. S3</b>  | GPC spectra of <b>P1d</b> and <b>P1e</b>            |
| <b>Fig. S4</b>  | FTIR spectra of <b>P1(a-c)</b>                      |
| <b>Fig. S5</b>  | FTIR spectra of <b>P1(d-e)</b>                      |
| <b>Fig. S6</b>  | Solution doping spectra of <b>P1e</b>               |
| <b>Fig. S7</b>  | Spectroelectrochemical spectra of <b>P1e</b>        |
| <b>Fig. S8</b>  | Dynamic light scattering spectra for <b>P1a:PSS</b> |
| <b>Fig. S9</b>  | Dynamic light scattering spectra for <b>P1b:PSS</b> |
| <b>Fig. S10</b> | Dynamic light scattering spectra for <b>P1c:PSS</b> |
| <b>Fig. S11</b> | Dynamic light scattering spectra for <b>P1d:PSS</b> |
| <b>Fig. S12</b> | Dynamic light scattering spectra for <b>P1e:PSS</b> |
| <b>Fig. S13</b> | Cyclic voltammogram of <b>P1a:PSS</b>               |
| <b>Fig. S14</b> | Cyclic voltammogram of <b>P1b:PSS</b>               |
| <b>Fig. S15</b> | Cyclic voltammogram of <b>P1c:PSS</b>               |
| <b>Fig. S16</b> | Cyclic voltammogram of <b>P1e:PSS</b>               |
| <b>Fig. S17</b> | Spectroelectrochemical spectra for <b>P1a:PSS</b>   |
| <b>Fig. S18</b> | Spectroelectrochemical spectra for <b>P1b:PSS</b>   |
| <b>Fig. S19</b> | Spectroelectrochemical spectra for <b>P1c:PSS</b>   |
| <b>Fig. S20</b> | Spectroelectrochemical spectra for <b>P1e:PSS</b>   |
| <b>Fig. S21</b> | Optical switching studies for <b>P1a:PSS</b>        |

**Fig. S22** Optical switching studies for **P1b**:PSS

**Fig. S23** Optical switching studies for **P1c**:PSS

**Fig. S24** Optical switching studies for **P1e**:PSS

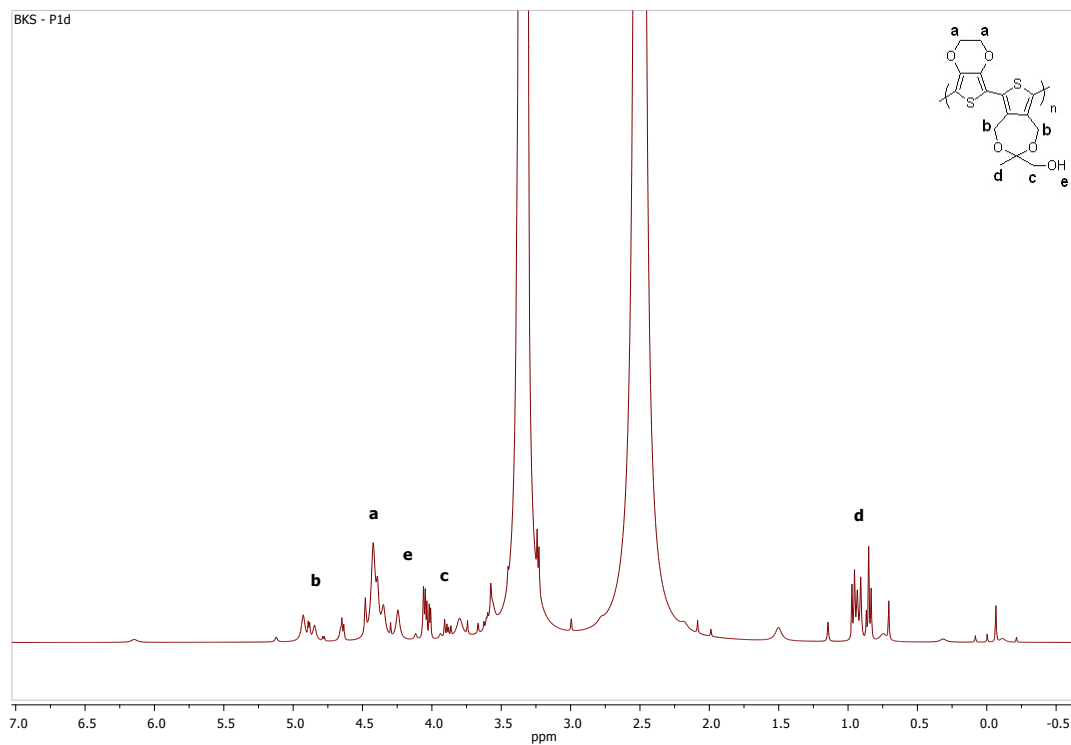

**Fig. S1** <sup>1</sup>H NMR spectra of **P1d**.

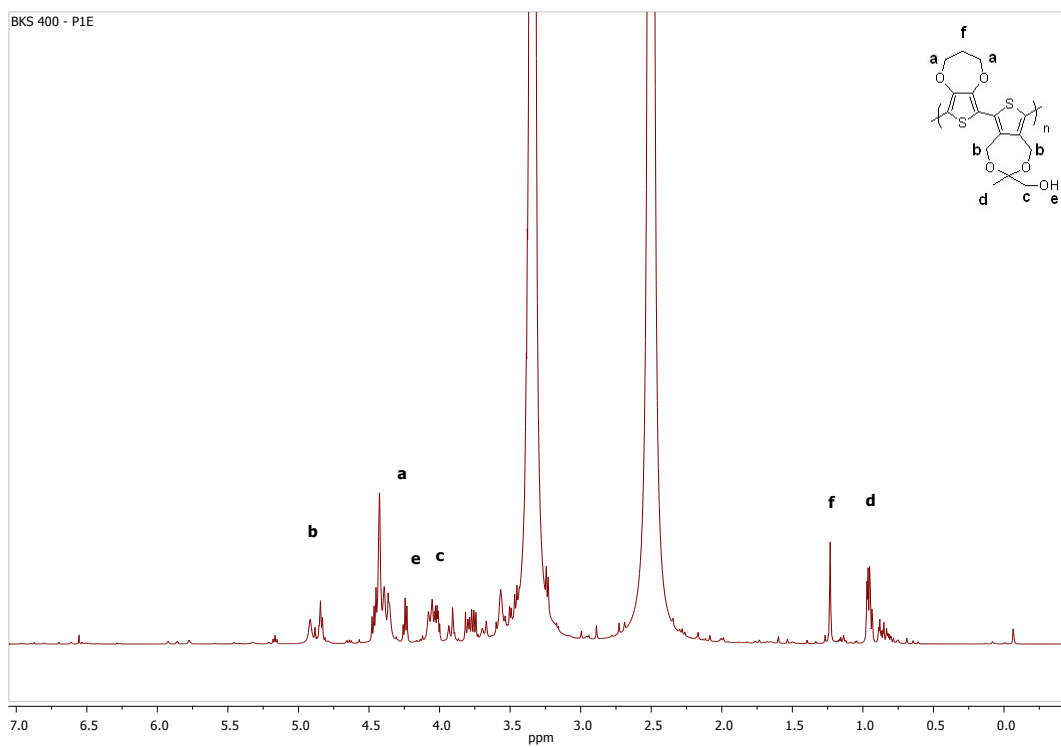

**Fig. S2** <sup>1</sup>H NMR spectra of **P1e**.

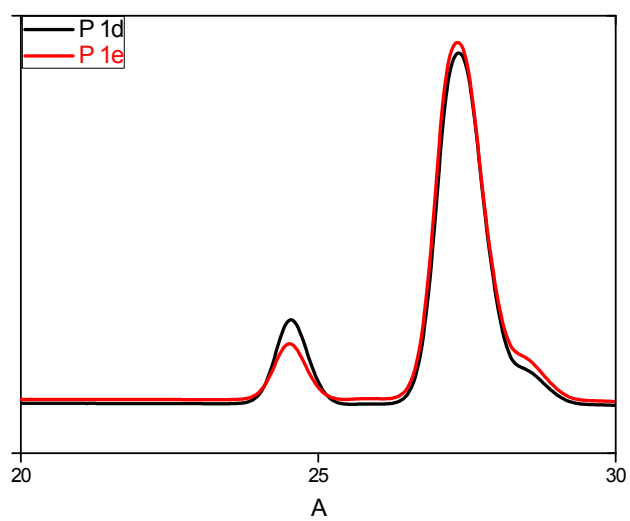

**Fig. S3** GPC spectra of **P1d** and **P1e**.

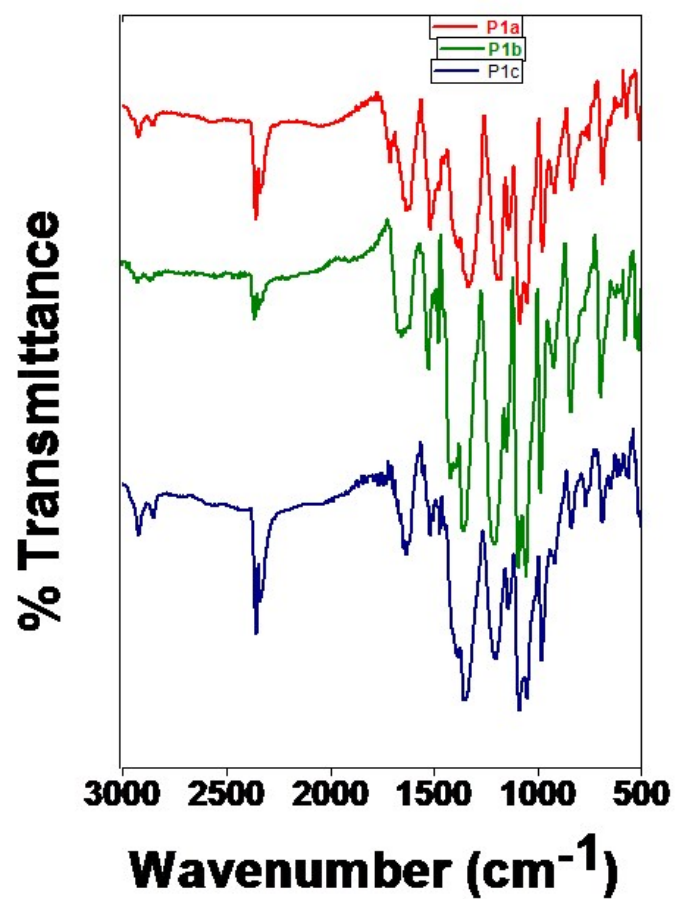

Fig. S4 FTIR spectra of P1(a-c).

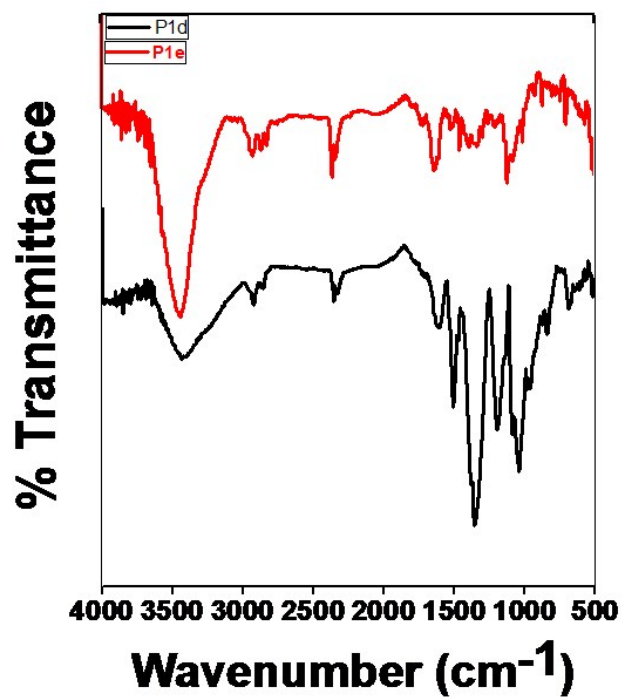

Fig. S5 FTIR spectra of P1d-e.

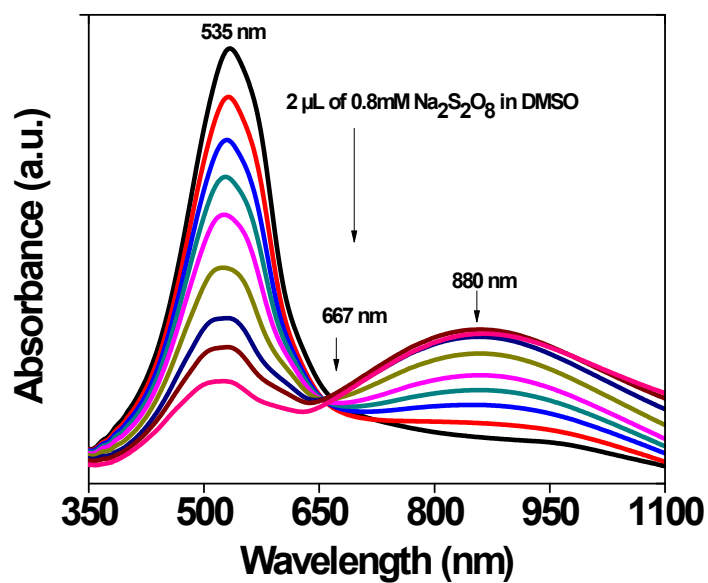

**Fig. S6** Solution doping of **P1e** using 2 μL of 0.8 mM of Na<sub>2</sub>S<sub>2</sub>O<sub>8</sub> in DMSO as a dopant.

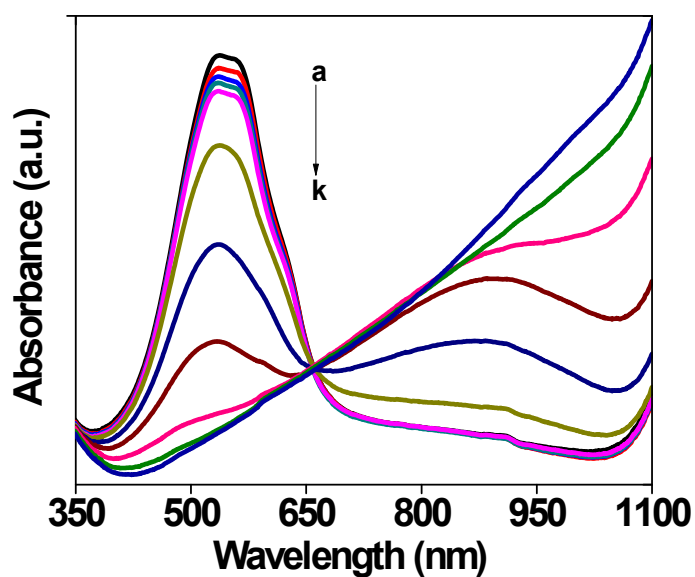

**Fig. S7** Spectroelectrochemical spectra for **P1e** as a function of applied potential between -1 and +1 V in 0.1 M TBAP/ACN: (a) -1 V, (b) -0.8, (c) -0.6, (d) -0.4, (e) -0.2, (f) 0, (g) +0.2, (h) +0.4, (i) +0.6, (j) +0.8 (k) +1 V.

**PEDOT/PSS final (Combined)**  
**Effective Diameter:** 430.5 nm  
**Polydispersity:** 0.114  
**Avg. Count Rate:** 164.1 kcps  
**Baseline Index:** 9.1/ 96.49%  
**Elapsed Time:** 00:05:00

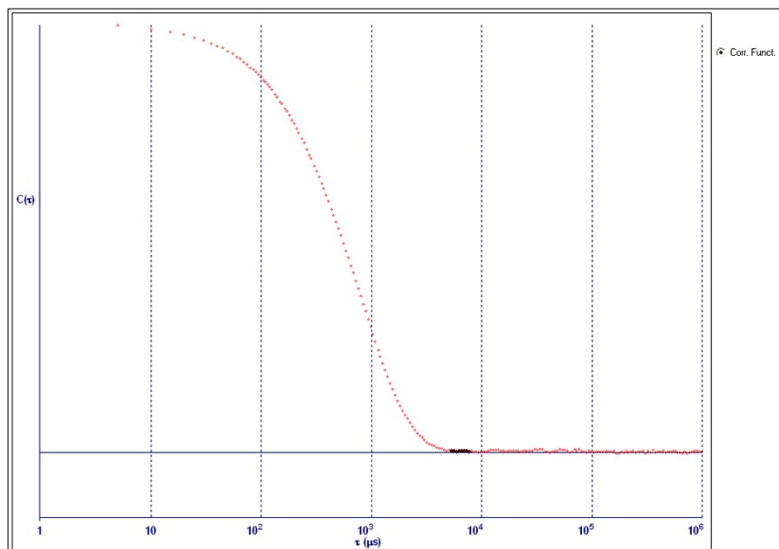

| Run        | Eff. Diam. (nm) | Hall Width (nm) | Polydispersity | Baseline Index |
|------------|-----------------|-----------------|----------------|----------------|
| 1          | 421.3           | 153.9           | 0.133          | 10.0/ 86.69%   |
| 2          | 439.0           | 153.4           | 0.122          | 10.0/ 95.75%   |
| 3          | 429.1           | 145.4           | 0.115          | 9.7/100.00%    |
| 4          | 431.7           | 141.8           | 0.108          | 7.7/100.00%    |
| 5          | 427.6           | 161.7           | 0.143          | 10.0/100.00%   |
| Mean       | 429.7           | 151.2           | 0.124          | 9.5/ 96.49%    |
| Std. Error | 2.9             | 3.5             | 0.006          | 0.4/ 2.58      |
| Combined   | 430.5           | 145.3           | 0.114          | 9.1/ 96.49%    |

**Fig. S8** Dynamic light scattering spectra for **P1a:PSS**

**P(EDOT-ProDOT)-PSS (Combined)**  
**Effective Diameter:** 454.0 nm  
**Polydispersity:** 0.220  
**Avg. Count Rate:** 110.0 kcps  
**Baseline Index:** 2.3/ 99.17%  
**Elapsed Time:** 00:05:00

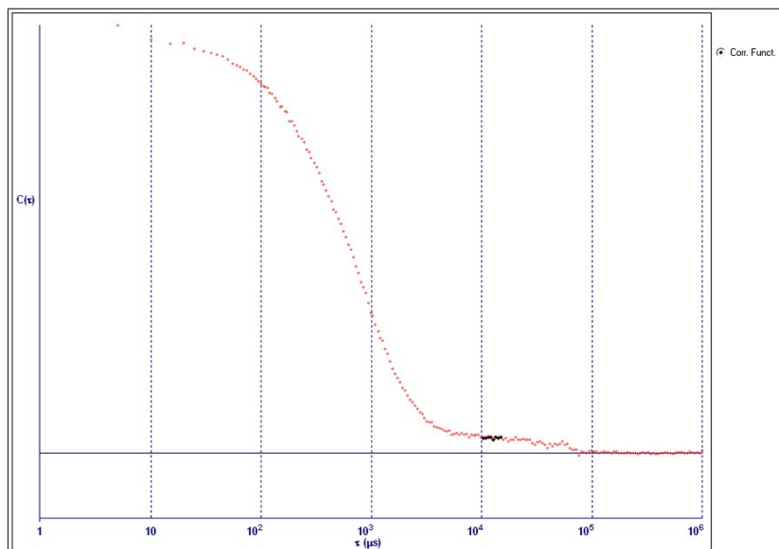

| Run        | Eff. Diam. (nm) | Hall Width (nm) | Polydispersity | Baseline Index |
|------------|-----------------|-----------------|----------------|----------------|
| 1          | 439.0           | 182.8           | 0.173          | 0.0/100.00%    |
| 2          | 437.3           | 215.9           | 0.244          | 1.0/100.00%    |
| 3          | 450.4           | 209.9           | 0.217          | 1.9/ 95.83%    |
| 4          | 454.3           | 187.5           | 0.170          | 2.9/100.00%    |
| 5          | 454.4           | 212.7           | 0.219          | 0.0/100.00%    |
| Mean       | 447.1           | 201.8           | 0.205          | 1.3/ 99.17%    |
| Std. Error | 3.7             | 6.9             | 0.014          | 0.6/ 0.83      |
| Combined   | 454.0           | 212.9           | 0.220          | 2.3/ 99.17%    |

**Fig. S9** Dynamic light scattering spectra for **P1b:PSS**

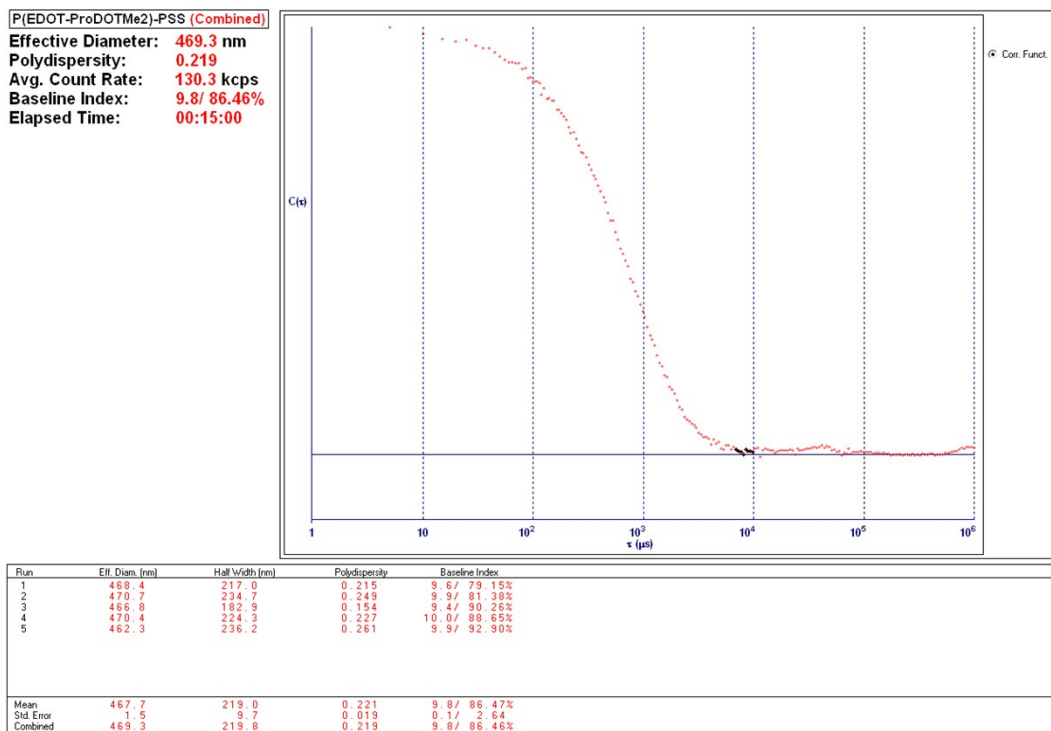

**Fig. S10** Dynamic light scattering spectra for **P1c:PSS**

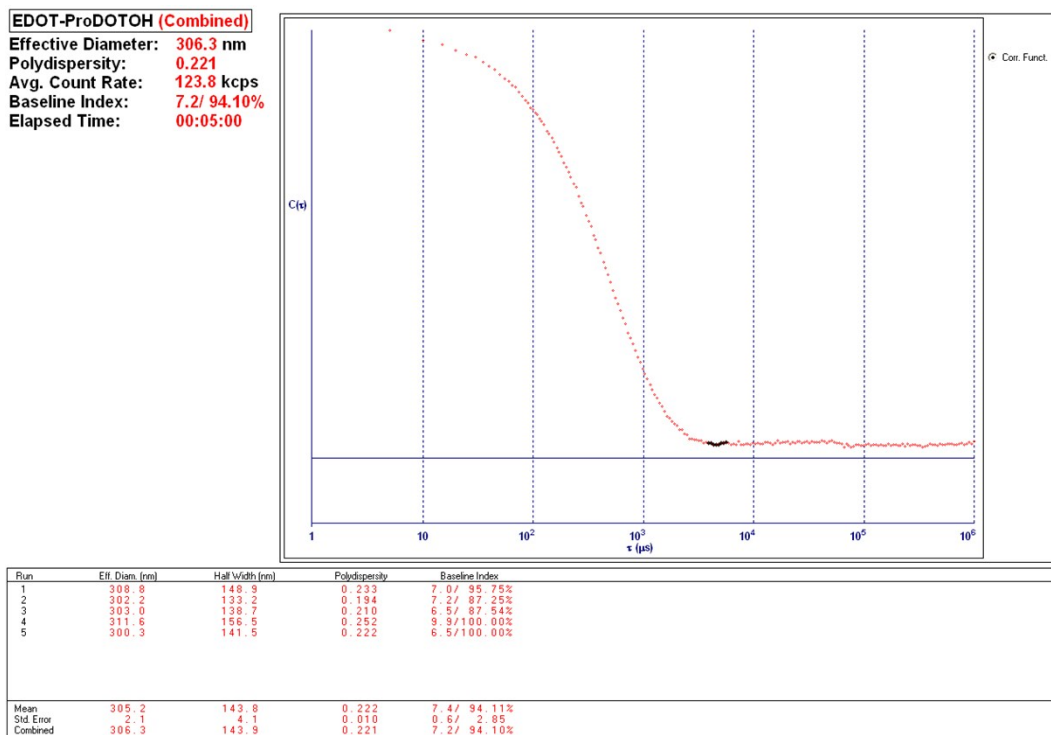

**Fig. S11** Dynamic light scattering spectra for **P1d:PSS**

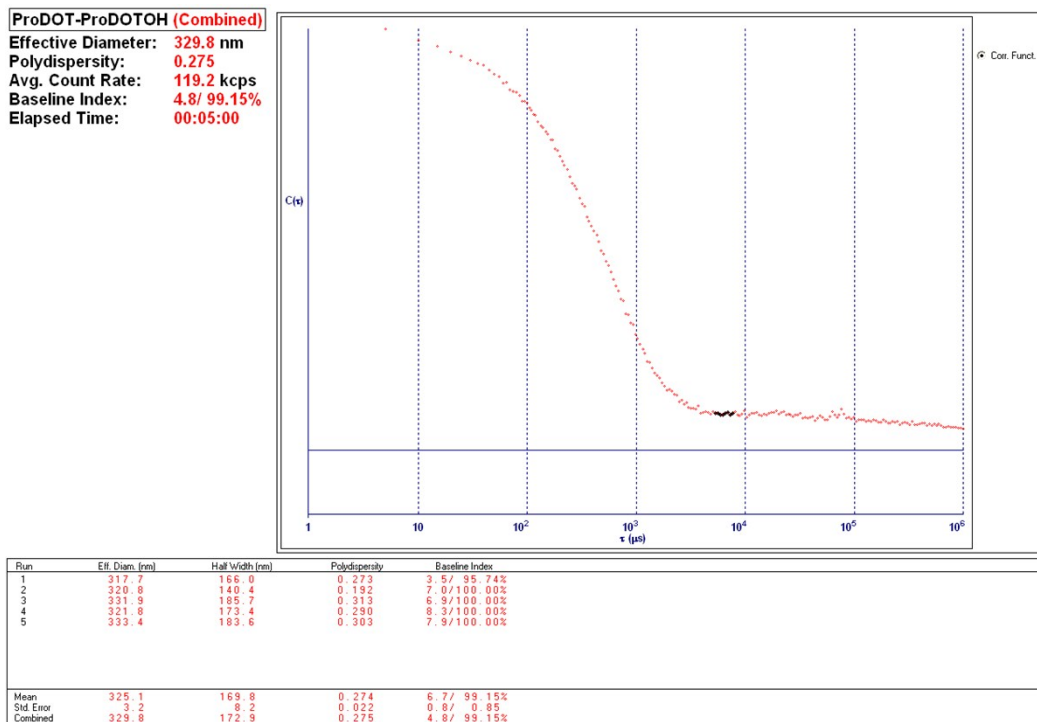

**Fig. S12** Dynamic light scattering spectra for **P1e:PSS**

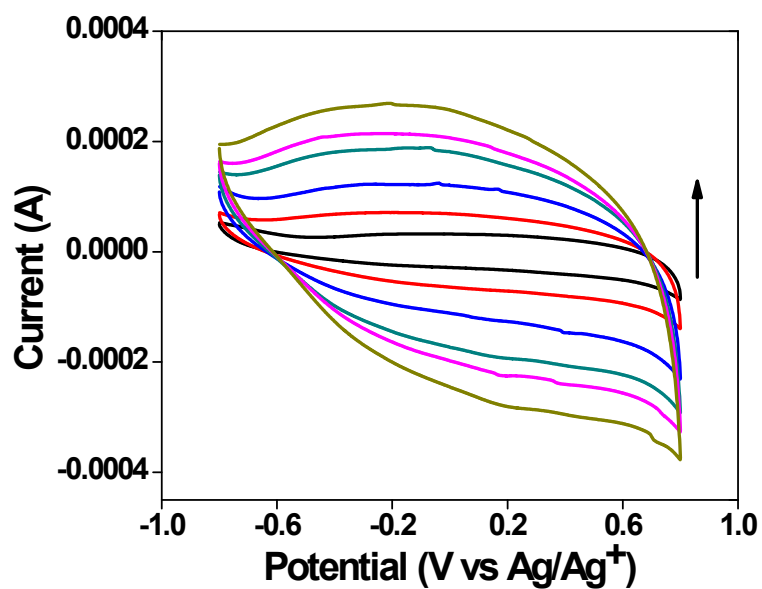

**Fig. S13** Cyclic voltammogram of **P1a:PSS** in 0.1 M TBAP/ACN at scan rate of (a) 25 mV/s, (b) 50 mV/s, (c) 75 mV/s, (d) 100 mV/s, (e) 125 mV/s and (f) 150 mV/s.



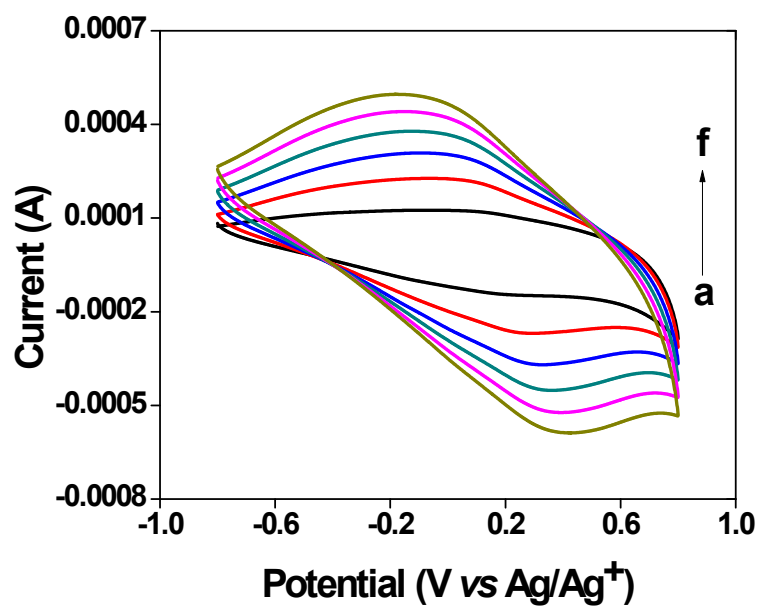

**Fig. S14** Cyclic voltammogram of **P1b**:PSS in 0.1 M TBAP/ACN at scan rate of (a) 25 mV/s, (b) 50 mV/s, (c) 75 mV/s, (d) 100 mV/s, (e) 125 mV/s and (f) 150 mV/s.

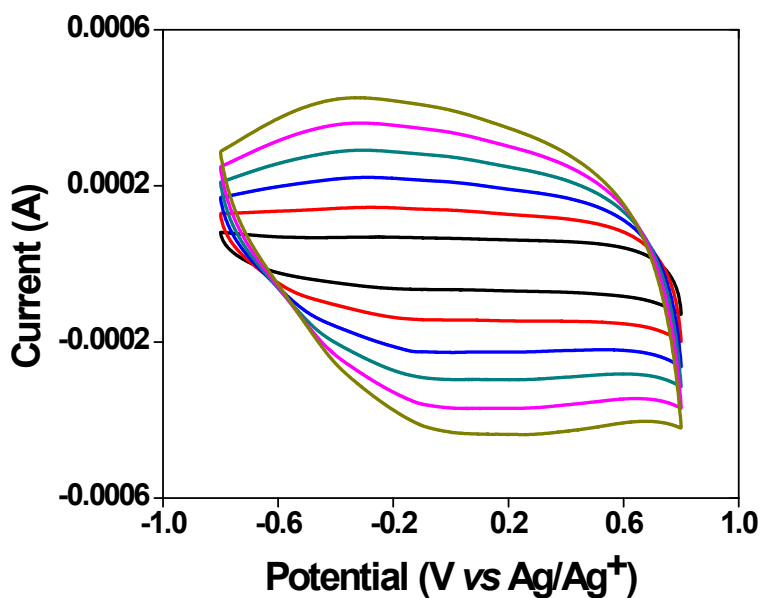

**Fig. S15** Cyclic voltammogram of **P1c**:PSS in 0.1 M TBAP/ACN at scan rate of (a) 25 mV/s, (b) 50 mV/s, (c) 75 mV/s, (d) 100 mV/s, (e) 125 mV/s and (f) 150 mV/s.

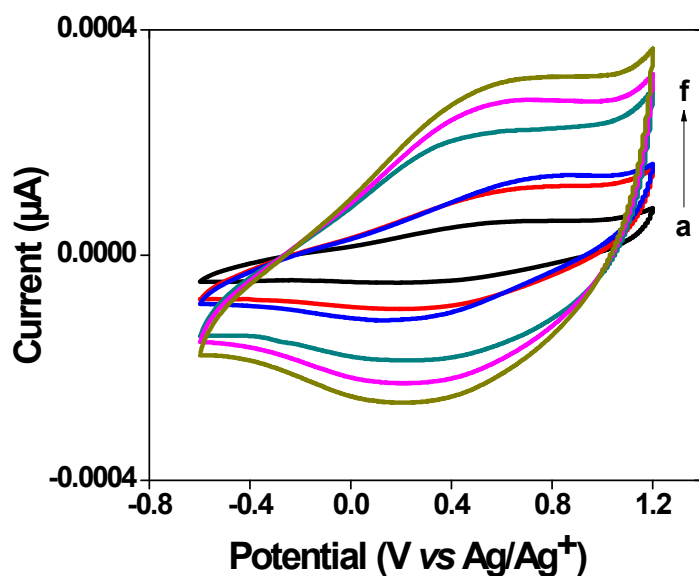

**Fig. S16** Cyclic voltammogram of **P1e:PSS** in 0.1 M TBAP/ACN at scan rate of (a) 25 mV/s, (b) 50 mV/s, (c) 75 mV/s, (d) 100 mV/s, (e) 125 mV/s and (f) 150 mV/s.

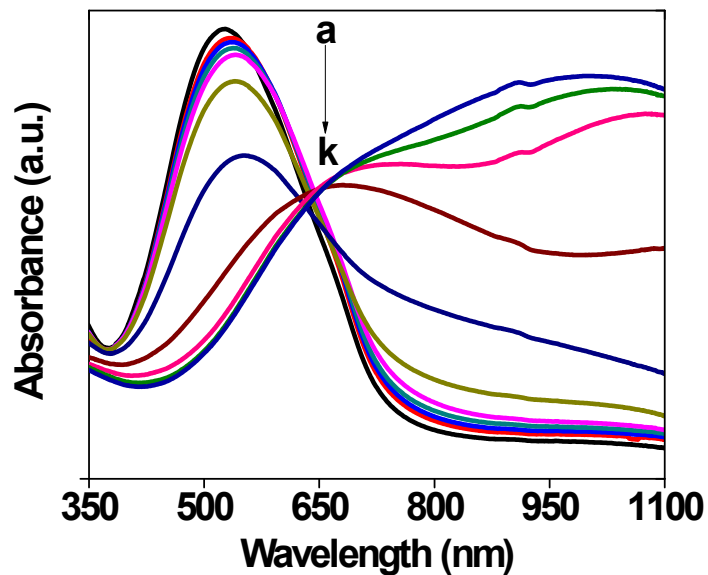

**Fig. S17** Spectroelectrochemical spectra for **P1a:PSS** as a function of applied potential between -1 V and +1 V in 0.1 M TBAP/ACN: (a) -1 V, (b) -0.8, (c) -0.6, (d) -0.4, (e) -0.2, (f) 0, (g) +0.1, (h) +0.2, (i) +0.3 (j) +0.8 (k) +1 V.

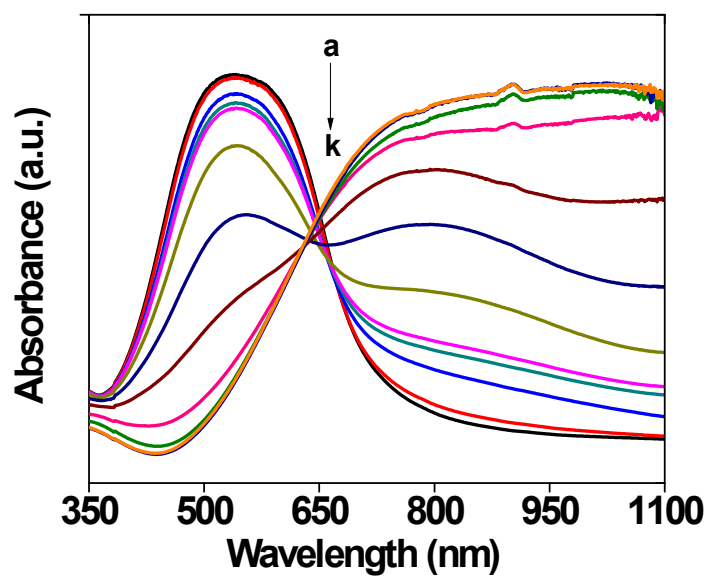

**Fig. S18** Spectroelectrochemical spectra for **P1b:PSS** as a function of applied potential between -1 V and +1 V in 0.1 M TBAP/ACN: (a) -1 V, (b) -0.8, (c) -0.6, (d) -0.4, (e) -0.2, (f) 0, (g) +0.1, (h) +0.2, (i) +0.3 (j) +0.8 (k) +1 V.

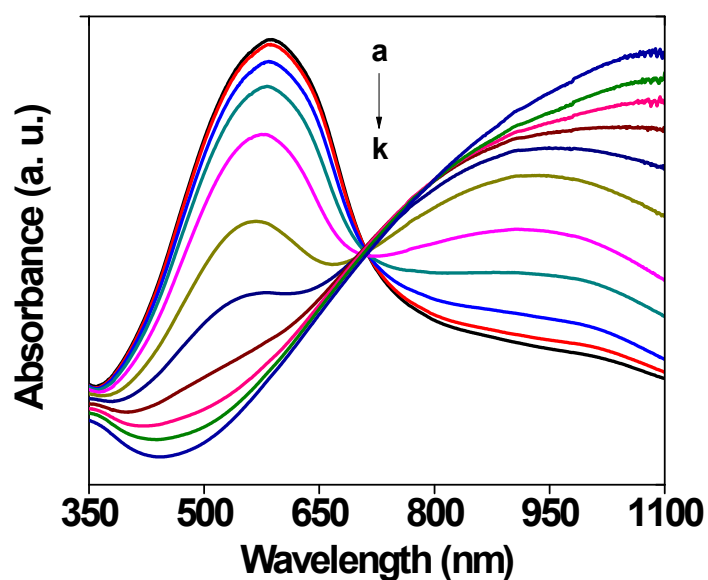

**Fig. S19** Spectroelectrochemical spectra for **P1c:PSS** as a function of applied potential between -1 V and +1 V in 0.1 M TBAP/ACN: (a) -1 V, (b) -0.8, (c) -0.6, (d) -0.4, (e) -0.2, (f) 0, (g) +0.1, (h) +0.2, (i) +0.3 (j) +0.8 (k) +1 V.

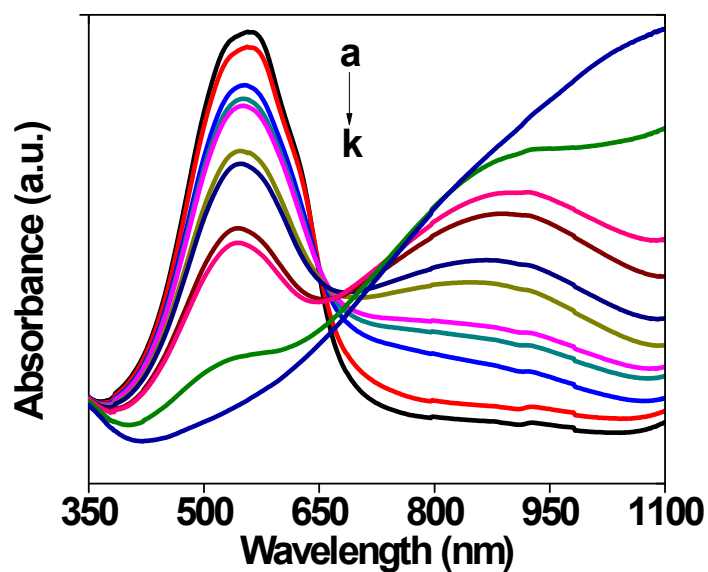

**Fig. S20** Spectroelectrochemical spectra for **P1e:PSS** as a function of applied potential between -1 V and +1 V in 0.1 M TBAP/ACN: (a) -1 V, (b) -0.8, (c) -0.6, (d) -0.4, (e) -0.2, (f) 0, (g) +0.1, (h) +0.2, (i) +0.3 (j) +0.8 (k) +1 V.

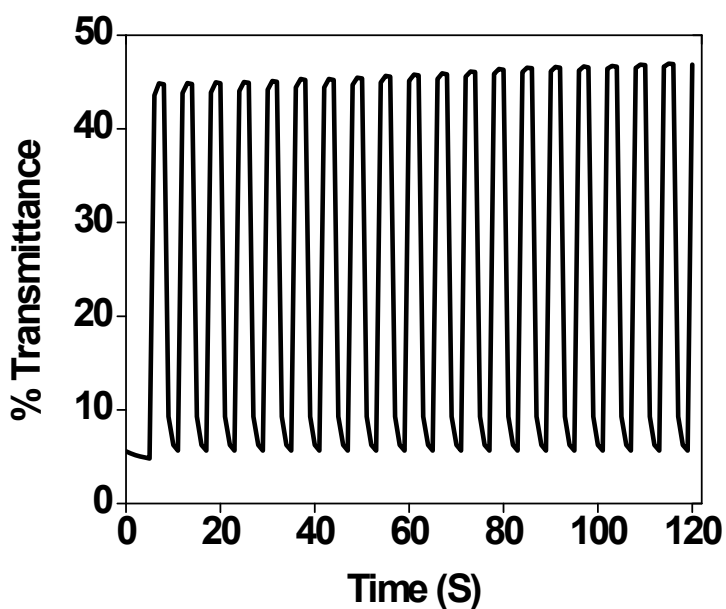

**Fig. S21** Optical switching studies for **P1a:PSS** film deposited by spin coating monitored at 525 nm, when it was stepped between its reduced (-1.0 V) and oxidized (+1.0 V) state.

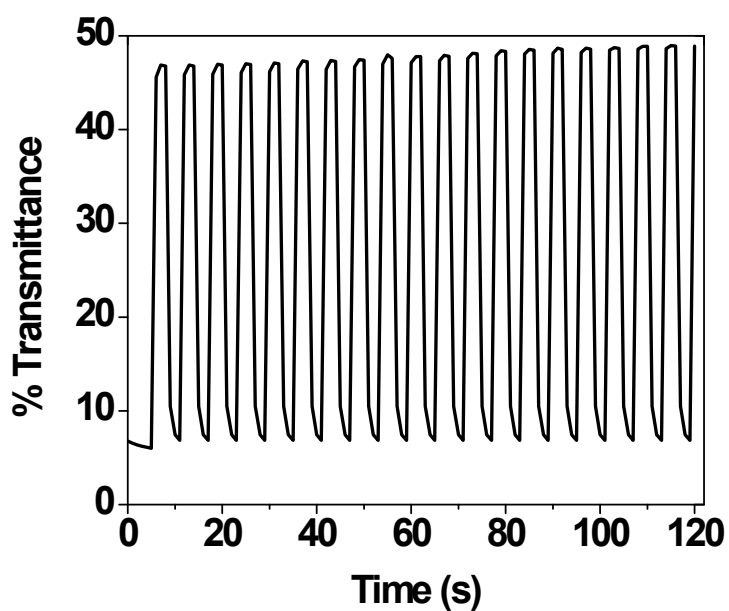

**Fig. S22:** Optical switching studies for **P1b**:PSS film deposited by spin coating monitored at 540 nm, when it was stepped between its reduced (-1.0 V) and oxidized (+1.0 V) state.

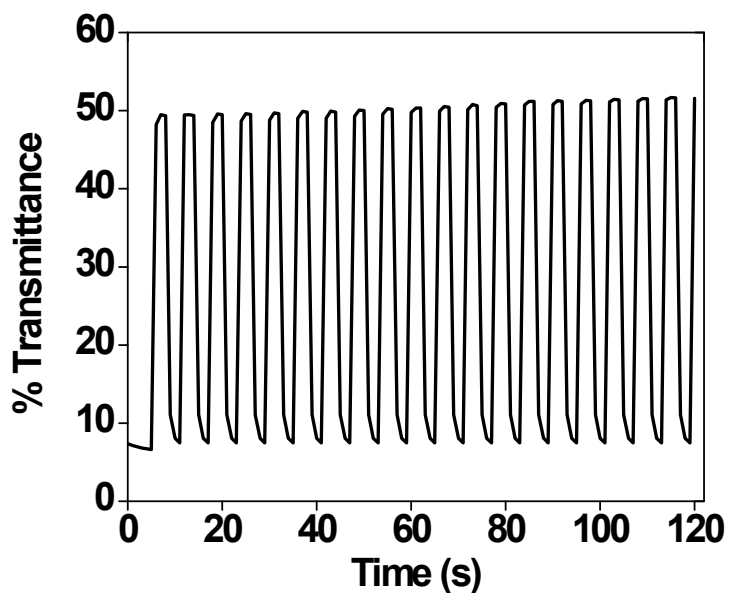

**Fig. S23** Optical switching studies for **P1c**:PSS film deposited by spin coating monitored at 585 nm, when it was stepped between its reduced (-1.0 V) and oxidized (+1.0 V) state.

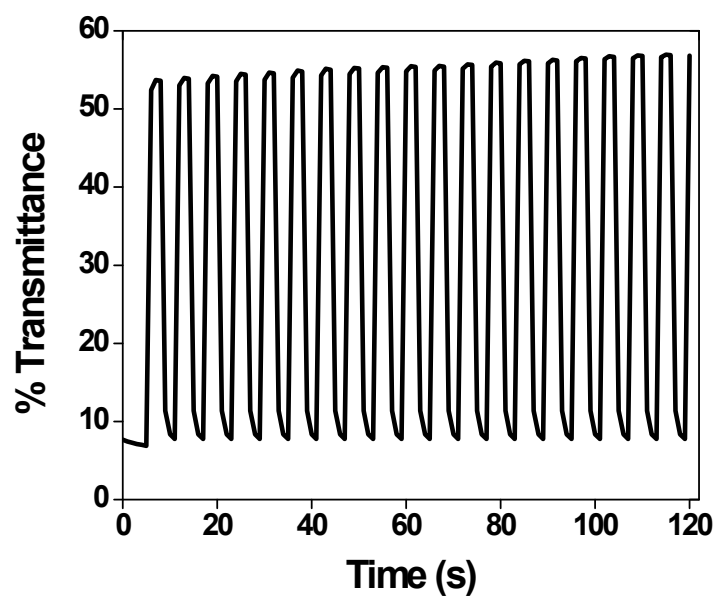

**Fig. S24** Optical switching studies for **P1e:PSS** film deposited by spin coating monitored at 555 nm, when it was stepped between its reduced (-1.0 V) and oxidized (+1.0 V) state.
